# Supplementary material
Source: PubMed Central journal article supplement (PMC3906817)
Supplement: ismej2013156x1.pdf [file ismej2013156x1.pdf]

**Supplementary Table S3.** Richness and diversity of 3% OTUs. Calculations were performed in Mothur by averaging 1000 random subsamples of 2500 sequences per sample.

| Sequencing Sample Name | DNA Sample | Good's coverage % (sd) | Observed Richness 3% OTUs (sd) | Non-parametric Shannon diversity (sd) | Chao (lower-upper 95% CI) |
|------------------------|------------|------------------------|--------------------------------|---------------------------------------|---------------------------|
| 1TC                    | CWH1B      | 97.4 (0.2)             | 147 (4)                        | 2.98 (0.02)                           | 224 (188-294)             |
| 1T                     | CWH1D      | 99.89 (0.05)           | 15 (1)                         | 1.64 (0.02)                           | 18 (16-31)                |
| 2TC                    | CWH2A      | 98.5 (0.2)             | 72 (4)                         | 2.00 (0.02)                           | 126 (95-198)              |
| 2T                     | CWH2C      | 99.67 (0.09)           | 22 (2)                         | 1.34 (0.02)                           | 35 (26-76)                |
| 3TC                    | CWH3B      | 99.64 (0.04)           | 29 (1)                         | 2.06 (0.01)                           | 38 (31-68)                |
| 3T                     | CWH3C      | 99.82 (0.03)           | 22 (1)                         | 2.06 (0.01)                           | 28 (23-56)                |
| BW                     | CBW3       | 88.0 (0.5)             | 526 (11)                       | 4.51 (0.04)                           | 973 (853-1136)            |
| CW                     | CCW2       | 94.2 (0.4)             | 278 (9)                        | 3.70 (0.04)                           | 528 (437-671)             |

**Supplementary Figure S1.** Phylogenetic tree of tunicate COI genes. The COI gene from two Woods Hole *C. intestinalis* individuals was amplified and sequenced using primers Ci-CoIF (5'-CCTAGATTTAGAATAATTAGTCATG-3') and Ci-CoIR (5'-CGAGGTATTCTACTTAATCT-3') as described in (Caputi *et al.*, 2007). Amino acid sequences of tunicate COI genes were aligned in ClustalX and a neighbor-joining tree with 1000x bootstraps was calculated in ClustalX. Nodes with bootstrap support >90% are indicated by filled circles.

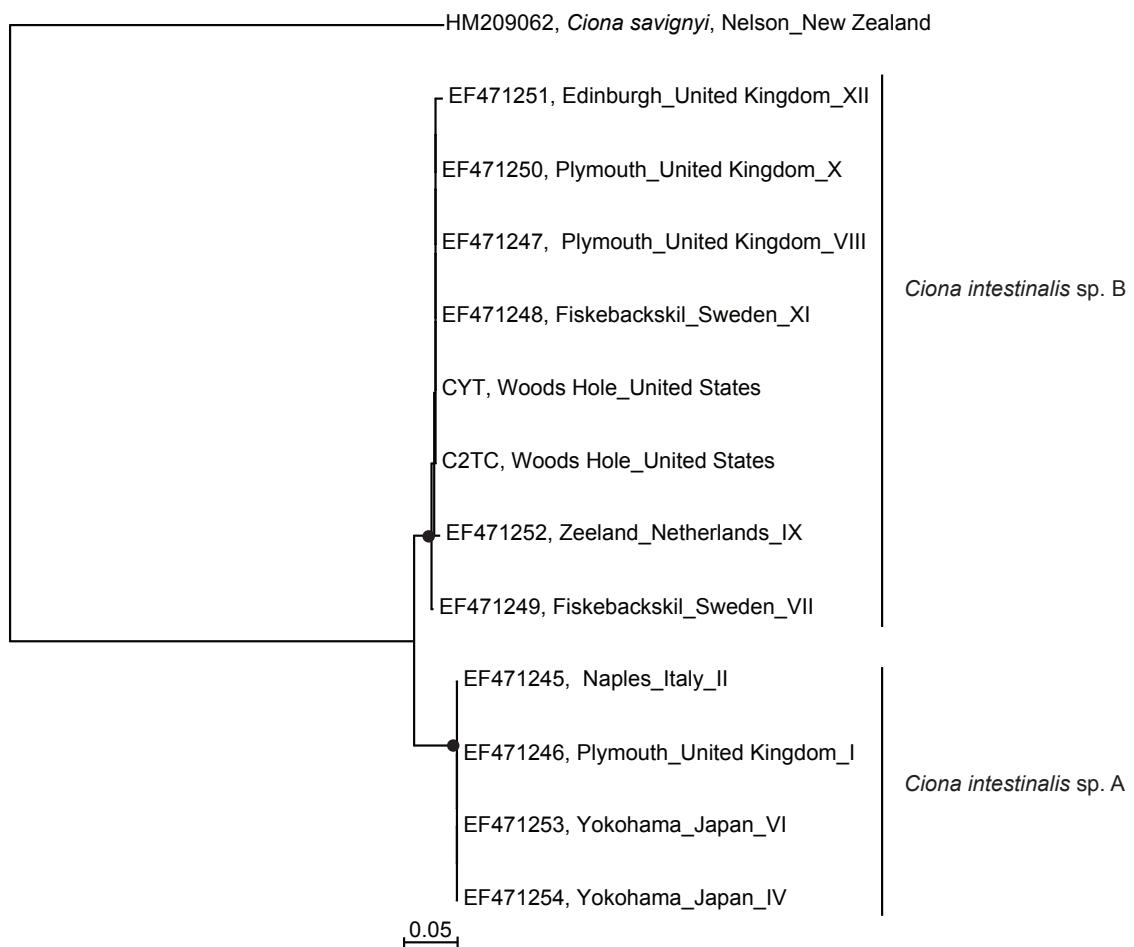

**Supplementary Figure S2.** 16S rRNA gene DGGE analysis. **(a)** Samples containing both tunic and cuticle (TC) are shown in green, tunic only (T) in orange, collection site seawater (CSW1-3) in blue, and shipping bag seawater (CBW1-3) in brown. Samples that were selected for 454 sequencing are shown in bold, and their 454 sequencing ID is indicated in parentheses. Numbers indicate sequenced bands and RDP classification at a 50% bootstrap cutoff is shown. **(b)** Clustering of DGGE banding patterns by similarity.

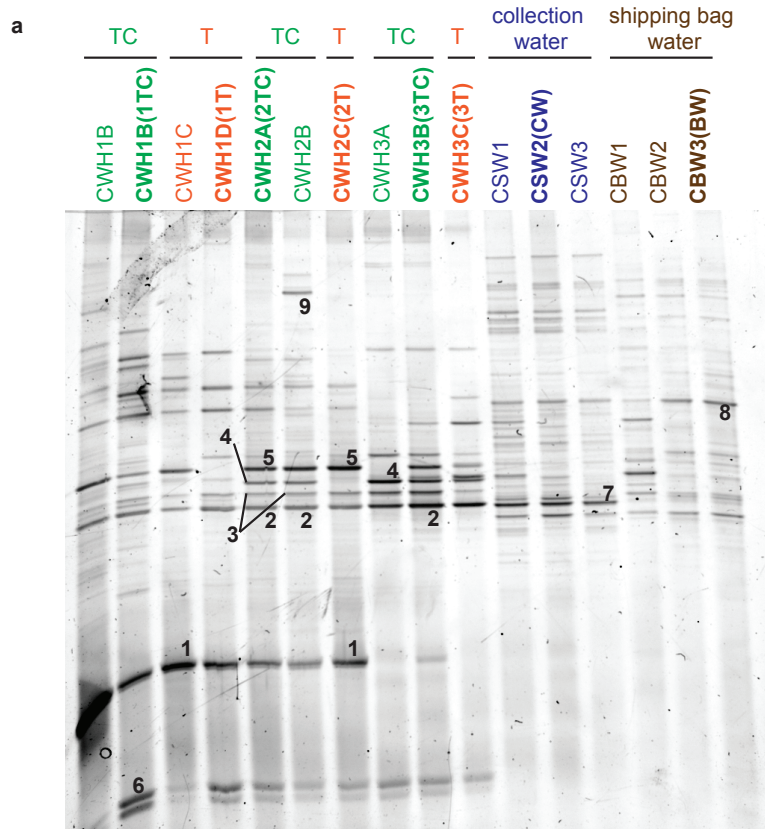

- 1 Flavobacteria\_unclassified (100% ID to isolate CWH016)
- 2 Alphaproteobacteria\_unclassified (100% isolate CWH001)
- 3 Alphaproteobacteria\_unclassified
- 4 Alphaproteobacteria\_Terasakiella (100% ID to isolate CWH003)
- 5 Alphaproteobacteria\_unclassified
- 6 Alphaproteobacteria\_unclassified
- 7 Alphaproteobacteria\_unclassified
- 8 Cyanobacteria\_GpIIa
- 9 Verrucomicrobia\_Rubritalea

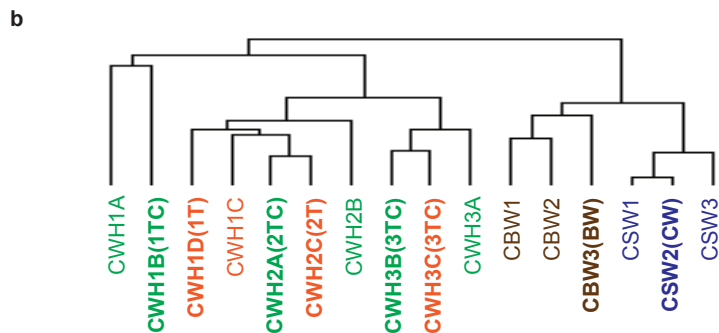

**Supplementary Figure S3.** Rarefaction curves of 454 amplicon sequencing samples.

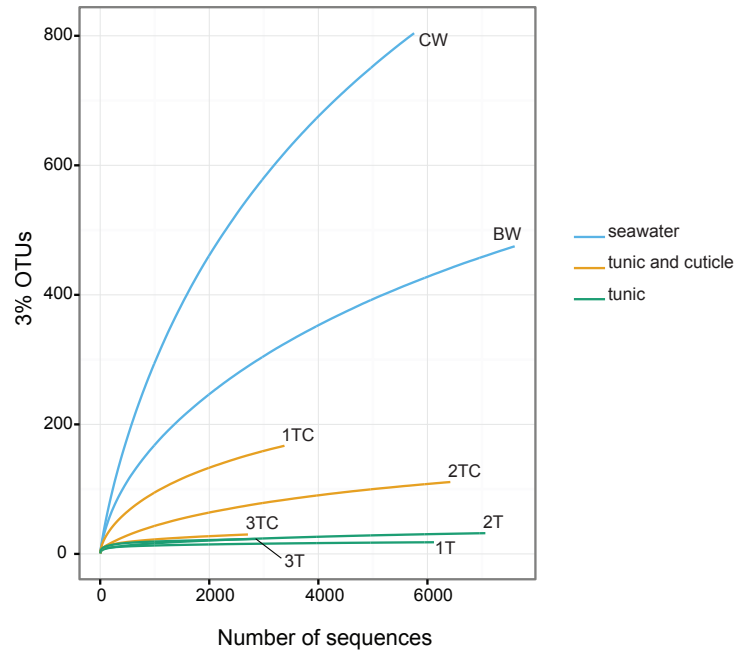

### Supplementary References

Caputi L, Andreakis N, Mastrototaro F, Cirino P, Vassillo M, Sordino P (2007). Cryptic speciation in a model invertebrate chordate. *Proc Natl Acad Sci USA* **104**: 9364-9369.

Muyzer G, de Waal EC, Uitterlinden AG (1993). Profiling of complex microbial populations by denaturing gradient gel electrophoresis analysis of polymerase chain reaction-amplified genes coding for 16S rRNA. *Appl Environ Microbiol* **59**: 695-700.
